# Supplementary material for: Common and Low Frequency Variants in MERTK Are Independently Associated with Multiple Sclerosis Susceptibility with Discordant Association Dependent upon HLA-DRB1*15:01 Status
Source: PubMed Central journal article supplement (PMC4798184; doi:10.1371/journal.pgen.1005853), 2016-03-18

Supplemental Figure S1

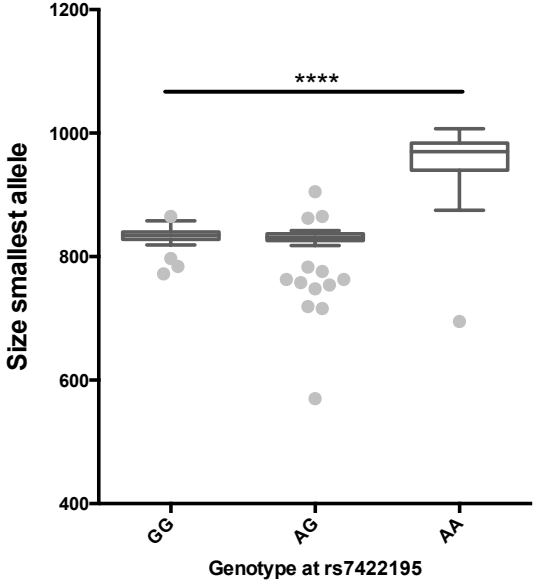

Supplement: pgen.1005853.s001.pdf [file pgen.1005853.s001.pdf]
