# Supplementary material for: Common and Low Frequency Variants in MERTK Are Independently Associated with Multiple Sclerosis Susceptibility with Discordant Association Dependent upon HLA-DRB1*15:01 Status
Source: PubMed Central journal article supplement (PMC4798184; doi:10.1371/journal.pgen.1005853), 2016-03-18
Supplement: pgen.1005853.s002.pdf [file pgen.1005853.s002.pdf]

Table S1: Hardy-Weinberg Tests

| Variant                               | Chr. <sup>a</sup> | Location <sup>b</sup> | All samples          |                      |          | Cases    |          |          | Controls |          |         |
|---------------------------------------|-------------------|-----------------------|----------------------|----------------------|----------|----------|----------|----------|----------|----------|---------|
|                                       |                   |                       | Obs <sup>c</sup> Het | Exp <sup>d</sup> Het | p-value  | Obs Het  | Exp Het  | p-value  | Obs Het  | Exp Het  | p-value |
| Variants tested in fine-mapping study |                   |                       |                      |                      |          |          |          |          |          |          |         |
| rs1063                                | 2                 | 18026245              | 0.2589               | 0.2641               | 0.09887  | 0.2581   | 0.2621   | 0.3847   | 0.2596   | 0.266    | 0.165   |
| rs1109465                             | 2                 | 26606154              | 0.1284               | 0.1286               | 0.9248   | 0.1368   | 0.1343   | 0.3598   | 0.1207   | 0.1233   | 0.2191  |
| rs12466022                            | 2                 | 43359061              | 0.392                | 0.3911               | 0.8771   | 0.3866   | 0.379    | 0.2675   | 0.3969   | 0.4016   | 0.4792  |
| rs7595037                             | 2                 | 68647095              | 0.4919               | 0.4929               | 0.8633   | 0.4917   | 0.4909   | 0.943    | 0.4921   | 0.4945   | 0.7859  |
| 1kqp_chr2_0158.SNP                    | 2                 | 112358325             | 0.4959               | 0.4961               | 0.9805   | 0.4943   | 0.4963   | 0.8321   | 0.4973   | 0.4959   | 0.8926  |
| 1kqp_chr2_1082.SNP                    | 2                 | 112358386             | 0.03595              | 0.03643              | 0.2993   | 0.03523  | 0.03579  | 0.2925   | 0.03661  | 0.03702  | 0.3622  |
| 1kqp_chr2_0160.SNP                    | 2                 | 112358829             | 0.4992               | 0.4945               | 0.4507   | 0.515    | 0.4956   | 0.0324   | 0.4847   | 0.4933   | 0.3116  |
| 1kqp_chr2_0170.SNP                    | 2                 | 112360602             | 0.3831               | 0.3839               | 0.8747   | 0.381    | 0.3844   | 0.6162   | 0.3851   | 0.3833   | 0.827   |
| 1kqp_chr2_1086.SNP                    | 2                 | 112361648             | 0.005845             | 0.005828             | 1        | 0.005819 | 0.005802 | 1        | 0.005869 | 0.005852 | 1       |
| 1kqp_chr2_1087.SNP                    | 2                 | 112361890             | 0.09358              | 0.09343              | 1        | 0.09289  | 0.09301  | 0.8509   | 0.09421  | 0.09382  | 1       |
| 1kqp_chr2_1092.SNP                    | 2                 | 112367731             | 0                    | 0                    | 1        | 0        | 0        | 1        | 0        | 0        | 1       |
| 1kqp_chr2_1093.SNP                    | 2                 | 112367876             | 0.1793               | 0.1785               | 0.7347   | 0.1728   | 0.1715   | 0.759    | 0.1853   | 0.1848   | 1       |
| 1kqp_chr2_0191.SNP                    | 2                 | 112368535             | 0.1264               | 0.127                | 0.6346   | 0.1304   | 0.1325   | 0.3549   | 0.1227   | 0.122    | 0.8907  |
| 1kqp_chr2_1760.SNP                    | 2                 | 112368729             | 0                    | 0                    | 1        | 0        | 0        | 1        | 0        | 0        | 1       |
| 1kqp_chr2_1095.SNP                    | 2                 | 112369363             | 0.3331               | 0.3346               | 0.7176   | 0.3299   | 0.3296   | 1        | 0.3361   | 0.3391   | 0.6212  |
| 1kqp_chr2_1096.SNP                    | 2                 | 112369671             | 0                    | 0                    | 1        | 0        | 0        | 1        | 0        | 0        | 1       |
| 1kqp_chr2_0192.SNP                    | 2                 | 112370186             | 0.08695              | 0.08716              | 0.7815   | 0.09186  | 0.09428  | 0.1369   | 0.08247  | 0.08061  | 0.2127  |
| 1kqp_chr2_0193.SNP                    | 2                 | 112370273             | 0.308                | 0.3076               | 0.9683   | 0.3045   | 0.306    | 0.7727   | 0.3111   | 0.3091   | 0.7426  |
| 1kqp_chr2_1098.SNP                    | 2                 | 112370675             | 0.02322              | 0.02295              | 1        | 0.02111  | 0.02088  | 1        | 0.02515  | 0.02484  | 1       |
| 1kqp_chr2_0194.SNP                    | 2                 | 112371433             | 0.235                | 0.2315               | 0.2294   | 0.2371   | 0.2341   | 0.5017   | 0.2332   | 0.2291   | 0.3074  |
| 1kqp_chr2_1099.SNP                    | 2                 | 112371713             | 0.4227               | 0.4238               | 0.8413   | 0.4262   | 0.4215   | 0.5604   | 0.4194   | 0.4259   | 0.3649  |
| 1kqp_chr2_1100.SNP                    | 2                 | 112371837             | 0.0126               | 0.01252              | 1        | 0.01321  | 0.01312  | 1        | 0.01204  | 0.01197  | 1       |
| 1kqp_chr2_1101.SNP                    | 2                 | 112371941             | 0.03629              | 0.03591              | 0.7299   | 0.03591  | 0.03527  | 0.626    | 0.03663  | 0.0365   | 1       |
| 1kqp_chr2_1174.SNP                    | 2                 | 112403459             | 0.4221               | 0.4242               | 0.6893   | 0.4264   | 0.4211   | 0.5053   | 0.4183   | 0.4269   | 0.2238  |
| rs6708131                             | 2                 | 112445659             | 0.4894               | 0.4892               | 1        | 0.4901   | 0.4877   | 0.798    | 0.4887   | 0.4906   | 0.835   |
| rs6733876                             | 2                 | 112447366             | 0.1059               | 0.1061               | 0.9088   | 0.1112   | 0.1121   | 0.637    | 0.1011   | 0.1005   | 0.8679  |
| 1kqp_chr2_0355.SNP                    | 2                 | 112468399             | 0.4738               | 0.47                 | 0.5199   | 0.4865   | 0.4738   | 0.1298   | 0.4622   | 0.4664   | 0.5905  |
| 1kqp_chr2_1285.SNP                    | 2                 | 112471351             | 0.4267               | 0.4262               | 0.9319   | 0.4319   | 0.4232   | 0.2627   | 0.422    | 0.4289   | 0.3473  |
| 1kqp_chr2_1286.SNP                    | 2                 | 112471414             | 0.4238               | 0.425                | 0.8198   | 0.4296   | 0.4222   | 0.3401   | 0.4186   | 0.4275   | 0.2102  |
| 1kqp_chr2_0389.SNP                    | 2                 | 112482444             | 0.4765               | 0.4708               | 0.3283   | 0.4901   | 0.4745   | 0.06441  | 0.4641   | 0.4673   | 0.6935  |
| rs17040773                            | 2                 | 112500035             | 0.3755               | 0.3686               | 0.1339   | 0.3829   | 0.3741   | 0.2002   | 0.3686   | 0.3635   | 0.4263  |
| 1kqp_chr2_1342.SNP                    | 2                 | 112503333             | 0                    | 0                    | 1        | 0        | 0        | 1        | 0        | 0        | 1       |
| 1kqp_chr2_0441.SNP                    | 2                 | 112503461             | 0.06393              | 0.06489              | 0.194    | 0.06742  | 0.06971  | 0.07249  | 0.06073  | 0.06046  | 1       |
| 1kqp_chr2_0442.SNP                    | 2                 | 112503686             | 0.1386               | 0.14                 | 0.388    | 0.1451   | 0.1512   | 0.02728  | 0.1326   | 0.1296   | 0.1965  |
| 1kqp_chr2_0443.SNP                    | 2                 | 112504276             | 0.1133               | 0.1183               | 0.001217 | 0.1196   | 0.1294   | 9.11E-05 | 0.1076   | 0.1079   | 0.7547  |
| 1kqp_chr2_0445.SNP                    | 2                 | 112504566             | 0.1383               | 0.1395               | 0.4877   | 0.1448   | 0.1504   | 0.04657  | 0.1325   | 0.1295   | 0.1965  |
| 1kqp_chr2_0446.SNP                    | 2                 | 112504851             | 0.1377               | 0.139                | 0.4336   | 0.144    | 0.1497   | 0.03467  | 0.132    | 0.1291   | 0.1966  |

|                    |   |           |           |           |          |           |           |           |          |           |          |
|--------------------|---|-----------|-----------|-----------|----------|-----------|-----------|-----------|----------|-----------|----------|
| 1kgp_chr2_1346.SNP | 2 | 112505086 | 0         | 0         | 1        | 0         | 0         | 1         | 0        | 0         | 1        |
| 1kgp_chr2_1347.SNP | 2 | 112505652 | 0.00322   | 0.003215  | 1        | 0.002143  | 0.002141  | 1         | 0.004206 | 0.004198  | 1        |
| 1kgp_chr2_1804.SNP | 2 | 112505721 | 0.0004388 | 0.0004387 | 1        | 0.0006126 | 0.0006124 | 1         | 0.00028  | 0.0002799 | 1        |
| 1kgp_chr2_0449.SNP | 2 | 112505852 | 0.1382    | 0.1397    | 0.3864   | 0.1448    | 0.1504    | 0.0466    | 0.1322   | 0.1297    | 0.3027   |
| 1kgp_chr2_0452.SNP | 2 | 112506327 | 0.03902   | 0.03826   | 0.1161   | 0.04167   | 0.0408    | 0.4028    | 0.03661  | 0.03594   | 0.6326   |
| 1kgp_chr2_1806.SNP | 2 | 112506527 | 0         | 0         | 1        | 0         | 0         | 1         | 0        | 0         | 1        |
| 1kgp_chr2_1350.SNP | 2 | 112507033 | 0.4213    | 0.4177    | 0.4871   | 0.4303    | 0.4153    | 0.04297   | 0.413    | 0.4198    | 0.3386   |
| rs1402939          | 2 | 112521897 | 0.4965    | 0.4897    | 0.254    | 0.4943    | 0.4908    | 0.6938    | 0.4986   | 0.4886    | 0.2423   |
| 1kgp_chr2_0482.SNP | 2 | 112524749 | 0.4569    | 0.4415    | 0.004186 | 0.4684    | 0.4408    | 0.0003882 | 0.4462   | 0.4421    | 0.5938   |
| 1kgp_chr2_0483.SNP | 2 | 112525307 | 0.3795    | 0.3802    | 0.8737   | 0.3725    | 0.3704    | 0.7767    | 0.3858   | 0.3888    | 0.6364   |
| 1kgp_chr2_0484.SNP | 2 | 112525690 | 0.4023    | 0.4027    | 0.9521   | 0.3907    | 0.3928    | 0.7552    | 0.413    | 0.4112    | 0.8388   |
| 1kgp_chr2_0485.SNP | 2 | 112526036 | 0.0613    | 0.0619    | 0.4281   | 0.06583   | 0.06823   | 0.06352   | 0.05711  | 0.05601   | 0.3689   |
| 1kgp_chr2_1374.SNP | 2 | 112526422 | 0.4204    | 0.4179    | 0.6433   | 0.4287    | 0.4157    | 0.07692   | 0.4129   | 0.4199    | 0.3194   |
| 1kgp_chr2_0489.SNP | 2 | 112527493 | 0.4458    | 0.442     | 0.4939   | 0.4571    | 0.4426    | 0.06875   | 0.4355   | 0.4414    | 0.426    |
| 1kgp_chr2_0490.SNP | 2 | 112527553 | 0.4456    | 0.4424    | 0.5659   | 0.4564    | 0.4435    | 0.1058    | 0.4357   | 0.4414    | 0.4482   |
| 1kgp_chr2_0491.SNP | 2 | 112528327 | 0.3176    | 0.3238    | 0.114    | 0.3201    | 0.3227    | 0.6612    | 0.3153   | 0.3249    | 0.07836  |
| 1kgp_chr2_1377.SNP | 2 | 112529327 | 0.4219    | 0.4193    | 0.6217   | 0.4289    | 0.4165    | 0.09851   | 0.4156   | 0.4218    | 0.3804   |
| 1kgp_chr2_1379.SNP | 2 | 112529537 | 0.4442    | 0.4425    | 0.763    | 0.4546    | 0.4429    | 0.1415    | 0.4348   | 0.4421    | 0.3249   |
| 1kgp_chr2_0494.SNP | 2 | 112529634 | 0.4441    | 0.4424    | 0.7631   | 0.4543    | 0.4426    | 0.1418    | 0.4348   | 0.4421    | 0.3247   |
| rs10190220         | 2 | 112583824 | 0.1377    | 0.1315    | 1.95E-05 | 0.146     | 0.14      | 0.01203   | 0.1301   | 0.1236    | 0.00058  |
| rs11682030         | 2 | 112585876 | 0.4363    | 0.4476    | 0.04003  | 0.4404    | 0.4421    | 0.8418    | 0.4326   | 0.4525    | 0.009427 |
| rs17040720         | 2 | 112622593 | 0.2796    | 0.2817    | 0.5479   | 0.2851    | 0.2807    | 0.4177    | 0.2746   | 0.2827    | 0.09715  |
| rs4848821          | 2 | 112626773 | 0.189     | 0.187     | 0.4377   | 0.1849    | 0.1811    | 0.2871    | 0.1927   | 0.1924    | 1        |
| rs17017209         | 2 | 112636718 | 0.02381   | 0.02353   | 1        | 0.02417   | 0.02387   | 1         | 0.02349  | 0.02321   | 1        |
| rs17835589         | 2 | 112641149 | 0.4088    | 0.4012    | 0.1236   | 0.4087    | 0.4025    | 0.3836    | 0.4089   | 0.4001    | 0.1947   |
| rs3814026          | 2 | 112641666 | 0.4971    | 0.4987    | 0.7894   | 0.4998    | 0.4981    | 0.8602    | 0.4947   | 0.4992    | 0.5917   |
| rs13016143         | 2 | 112649472 | 0.4608    | 0.4576    | 0.5783   | 0.4643    | 0.457     | 0.3774    | 0.4577   | 0.4581    | 0.9708   |
| rs12329119         | 2 | 112649794 | 0.359     | 0.3567    | 0.6348   | 0.3536    | 0.3531    | 0.9605    | 0.3639   | 0.36      | 0.5457   |
| rs34787974         | 2 | 112650905 | 0.3636    | 0.3598    | 0.4005   | 0.3623    | 0.3571    | 0.4325    | 0.3648   | 0.3622    | 0.7118   |
| rs7604403          | 2 | 112656652 | 0.4204    | 0.4227    | 0.6658   | 0.4213    | 0.4192    | 0.8004    | 0.4197   | 0.4258    | 0.4077   |
| rs1516629          | 2 | 112658779 | 0.3633    | 0.3578    | 0.2114   | 0.3513    | 0.3446    | 0.2864    | 0.3742   | 0.3693    | 0.4419   |
| rs869016           | 2 | 112659110 | 0.4678    | 0.4629    | 0.3879   | 0.4792    | 0.4666    | 0.1325    | 0.4574   | 0.4593    | 0.7987   |
| rs13006203         | 2 | 112661150 | 0.4261    | 0.4243    | 0.7317   | 0.4271    | 0.421     | 0.4286    | 0.4252   | 0.4272    | 0.7834   |
| rs10209260         | 2 | 112662407 | 0.08755   | 0.08824   | 0.4923   | 0.09096   | 0.09348   | 0.1308    | 0.08443  | 0.08342   | 0.6859   |
| rs7595212          | 2 | 112662767 | 0.4233    | 0.4241    | 0.8642   | 0.4248    | 0.4211    | 0.6473    | 0.4219   | 0.4269    | 0.4809   |
| rs17174697         | 2 | 112662914 | 0.4197    | 0.4214    | 0.7497   | 0.42      | 0.4173    | 0.7351    | 0.4194   | 0.425     | 0.449    |
| rs12989536         | 2 | 112663919 | 0.1752    | 0.1716    | 0.0903   | 0.1747    | 0.1744    | 1         | 0.1756   | 0.1689    | 0.01702  |
| rs10496439         | 2 | 112664631 | 0.4242    | 0.4234    | 0.909    | 0.4263    | 0.4203    | 0.4284    | 0.4222   | 0.4262    | 0.5826   |
| rs10496440         | 2 | 112664999 | 0.1436    | 0.1432    | 0.9327   | 0.1433    | 0.1445    | 0.6274    | 0.1439   | 0.1421    | 0.5553   |
| rs17174870         | 2 | 112665201 | 0.3638    | 0.3595    | 0.345    | 0.3498    | 0.3454    | 0.4777    | 0.3766   | 0.3719    | 0.4703   |
| rs17779482         | 2 | 112665677 | 0.4241    | 0.4239    | 0.9772   | 0.4266    | 0.4208    | 0.4538    | 0.4219   | 0.4267    | 0.5052   |
| rs11673729         | 2 | 112665961 | 0.4246    | 0.4242    | 0.9545   | 0.4265    | 0.4214    | 0.5065    | 0.4229   | 0.4267    | 0.5832   |

|            |   |           |         |         |          |         |         |         |         |         |          |
|------------|---|-----------|---------|---------|----------|---------|---------|---------|---------|---------|----------|
| rs7349221  | 2 | 112668341 | 0.4241  | 0.4244  | 0.9545   | 0.4265  | 0.4213  | 0.5059  | 0.4219  | 0.4272  | 0.4571   |
| rs4848861  | 2 | 112668835 | 0.424   | 0.4236  | 0.9544   | 0.4259  | 0.4205  | 0.4792  | 0.4222  | 0.4263  | 0.5825   |
| rs7568632  | 2 | 112669950 | 0.3641  | 0.3577  | 0.1459   | 0.3519  | 0.3447  | 0.2428  | 0.3751  | 0.369   | 0.3412   |
| rs1400321  | 2 | 112670046 | 0.3714  | 0.3617  | 0.03124  | 0.3575  | 0.3477  | 0.1174  | 0.3842  | 0.3741  | 0.1144   |
| rs1400322  | 2 | 112670185 | 0.5036  | 0.4969  | 0.2719   | 0.5124  | 0.4988  | 0.1292  | 0.4957  | 0.4943  | 0.8922   |
| rs1400323  | 2 | 112670461 | 0.5074  | 0.4969  | 0.08309  | 0.5188  | 0.4987  | 0.02423 | 0.497   | 0.4944  | 0.7602   |
| rs4264571  | 2 | 112674149 | 0.4234  | 0.4246  | 0.8188   | 0.4239  | 0.4214  | 0.7704  | 0.4229  | 0.4274  | 0.5287   |
| rs1516639  | 2 | 112675085 | 0.5065  | 0.4967  | 0.1072   | 0.519   | 0.4988  | 0.02214 | 0.4952  | 0.494   | 0.8921   |
| rs908518   | 2 | 112677626 | 0.473   | 0.4707  | 0.6994   | 0.4868  | 0.4746  | 0.1496  | 0.4604  | 0.4668  | 0.4091   |
| rs867311   | 2 | 112677970 | 0.3573  | 0.3566  | 0.8919   | 0.3453  | 0.3433  | 0.7593  | 0.3681  | 0.3682  | 1        |
| rs1996328  | 2 | 112680741 | 0.4743  | 0.47    | 0.4553   | 0.4879  | 0.4739  | 0.09622 | 0.4619  | 0.4661  | 0.5904   |
| rs1400325  | 2 | 112680934 | 0.364   | 0.358   | 0.1661   | 0.3529  | 0.3456  | 0.2439  | 0.3741  | 0.3688  | 0.4141   |
| rs1400324  | 2 | 112681220 | 0.365   | 0.3573  | 0.0782   | 0.3547  | 0.3449  | 0.1153  | 0.3745  | 0.3682  | 0.3175   |
| rs4848874  | 2 | 112681500 | 0.425   | 0.4264  | 0.7982   | 0.43    | 0.4238  | 0.4317  | 0.4204  | 0.4288  | 0.2571   |
| rs11687451 | 2 | 112682561 | 0.4238  | 0.4249  | 0.842    | 0.4284  | 0.4217  | 0.3834  | 0.4196  | 0.4277  | 0.2567   |
| rs4468823  | 2 | 112684371 | 0.4741  | 0.4702  | 0.5036   | 0.4876  | 0.4741  | 0.1121  | 0.4618  | 0.4665  | 0.5662   |
| rs6711987  | 2 | 112690175 | 0.4785  | 0.4974  | 0.002698 | 0.491   | 0.4989  | 0.4001  | 0.4669  | 0.4953  | 0.001121 |
| rs4848229  | 2 | 112692650 | 0.4236  | 0.4254  | 0.7119   | 0.4284  | 0.4224  | 0.4314  | 0.4192  | 0.4282  | 0.2114   |
| rs10207820 | 2 | 112699350 | 0.4747  | 0.4695  | 0.3663   | 0.4892  | 0.4734  | 0.05881 | 0.4615  | 0.4657  | 0.5895   |
| rs884448   | 2 | 112700328 | 0.5051  | 0.4965  | 0.1575   | 0.5169  | 0.4986  | 0.03807 | 0.4943  | 0.4938  | 0.973    |
| rs11683694 | 2 | 112702647 | 0.4249  | 0.4256  | 0.8869   | 0.4294  | 0.4226  | 0.3834  | 0.4208  | 0.4283  | 0.2917   |
| rs11692445 | 2 | 112704033 | 0.4247  | 0.425   | 0.9546   | 0.429   | 0.4222  | 0.3838  | 0.4207  | 0.4274  | 0.3475   |
| rs3761700  | 2 | 112705185 | 0.5054  | 0.4965  | 0.1425   | 0.5182  | 0.4985  | 0.02632 | 0.4937  | 0.4938  | 1        |
| rs3761699  | 2 | 112705290 | 0.424   | 0.426   | 0.6911   | 0.4284  | 0.4233  | 0.5086  | 0.4199  | 0.4284  | 0.2413   |
| rs1113419  | 2 | 112707483 | 0.363   | 0.3569  | 0.1649   | 0.3508  | 0.3437  | 0.2624  | 0.3741  | 0.3684  | 0.3885   |
| rs4848901  | 2 | 112710828 | 0.5054  | 0.4964  | 0.1366   | 0.5174  | 0.4984  | 0.03191 | 0.4945  | 0.4938  | 0.9459   |
| rs17175275 | 2 | 112712329 | 0.3645  | 0.3579  | 0.137    | 0.3537  | 0.3454  | 0.1872  | 0.3744  | 0.3689  | 0.3892   |
| rs11674883 | 2 | 112713069 | 0.4243  | 0.426   | 0.7547   | 0.4287  | 0.4231  | 0.4816  | 0.4203  | 0.4286  | 0.2573   |
| rs10187656 | 2 | 112716047 | 0.08898 | 0.0898  | 0.419    | 0.09216 | 0.09511 | 0.09334 | 0.08608 | 0.08493 | 0.5541   |
| rs7573344  | 2 | 112716317 | 0       | 0       | 1        | 0       | 0       | 1       | 0       | 0       | 1        |
| rs1122970  | 2 | 112716697 | 0.4245  | 0.4255  | 0.8423   | 0.4284  | 0.4225  | 0.4556  | 0.421   | 0.4283  | 0.31     |
| rs1546636  | 2 | 112722418 | 0.05862 | 0.05882 | 0.6807   | 0.06459 | 0.06536 | 0.4209  | 0.05316 | 0.05281 | 1        |
| rs6541971  | 2 | 112722490 | 0.4754  | 0.47    | 0.3531   | 0.4875  | 0.4735  | 0.09563 | 0.4642  | 0.4665  | 0.7736   |
| rs4848908  | 2 | 112723117 | 0.3032  | 0.3032  | 1        | 0.305   | 0.3055  | 0.9087  | 0.3015  | 0.3011  | 1        |
| rs7579906  | 2 | 112723366 | 0.4745  | 0.4697  | 0.4094   | 0.4877  | 0.4736  | 0.09554 | 0.4625  | 0.4658  | 0.6664   |
| rs10185747 | 2 | 112723865 | 0.08806 | 0.08924 | 0.2762   | 0.09158 | 0.09514 | 0.04091 | 0.08485 | 0.08381 | 0.6868   |
| rs10084408 | 2 | 112724421 | 0.0891  | 0.09017 | 0.3456   | 0.09269 | 0.09613 | 0.0454  | 0.08583 | 0.08469 | 0.5539   |
| rs2271701  | 2 | 112731173 | 0.4236  | 0.4263  | 0.5896   | 0.4279  | 0.4233  | 0.5623  | 0.4196  | 0.429   | 0.1976   |
| rs1607059  | 2 | 112734512 | 0.4753  | 0.4696  | 0.3271   | 0.4882  | 0.4732  | 0.07532 | 0.4635  | 0.4661  | 0.7465   |
| rs10166564 | 2 | 112736723 | 0.4748  | 0.4692  | 0.3267   | 0.4869  | 0.4726  | 0.0877  | 0.4639  | 0.4659  | 0.8015   |
| rs10199616 | 2 | 112737185 | 0.4733  | 0.4696  | 0.5364   | 0.4842  | 0.4732  | 0.1956  | 0.4633  | 0.4661  | 0.7194   |
| rs6725192  | 2 | 112738562 | 0.4739  | 0.47    | 0.5029   | 0.4857  | 0.4735  | 0.1483  | 0.4632  | 0.4666  | 0.6671   |

|            |   |           |         |         |         |         |         |         |         |         |        |
|------------|---|-----------|---------|---------|---------|---------|---------|---------|---------|---------|--------|
| rs17175626 | 2 | 112740597 | 0.3646  | 0.3544  | 0.01827 | 0.3528  | 0.3413  | 0.05707 | 0.3752  | 0.3658  | 0.1307 |
| rs10180345 | 2 | 112741293 | 0.474   | 0.4695  | 0.439   | 0.4857  | 0.4733  | 0.1387  | 0.4632  | 0.4658  | 0.7462 |
| rs13020304 | 2 | 112741535 | 0.4253  | 0.4256  | 0.9547  | 0.4305  | 0.4226  | 0.3002  | 0.4206  | 0.4282  | 0.2914 |
| rs1996325  | 2 | 112742075 | 0.4722  | 0.4703  | 0.738   | 0.4842  | 0.4738  | 0.2222  | 0.4614  | 0.4668  | 0.496  |
| rs4848923  | 2 | 112742451 | 0.4753  | 0.4698  | 0.3403  | 0.4885  | 0.4735  | 0.07535 | 0.4633  | 0.4662  | 0.7195 |
| rs11675946 | 2 | 112743033 | 0.4469  | 0.4476  | 0.8925  | 0.4572  | 0.4477  | 0.2408  | 0.4374  | 0.4475  | 0.1782 |
| rs11676037 | 2 | 112743385 | 0.4719  | 0.469   | 0.6407  | 0.4871  | 0.4726  | 0.08664 | 0.458   | 0.4656  | 0.3294 |
| rs1516628  | 2 | 112743800 | 0.4748  | 0.4697  | 0.3811  | 0.4876  | 0.4734  | 0.09575 | 0.4632  | 0.4662  | 0.7196 |
| rs1554214  | 2 | 112743917 | 0.4765  | 0.469   | 0.1946  | 0.4896  | 0.4732  | 0.05277 | 0.4646  | 0.4649  | 0.9712 |
| rs1554215  | 2 | 112744098 | 0.4745  | 0.47    | 0.4394  | 0.4868  | 0.4744  | 0.1495  | 0.4633  | 0.4657  | 0.7734 |
| rs11682629 | 2 | 112744299 | 0.424   | 0.4253  | 0.798   | 0.4289  | 0.4224  | 0.3845  | 0.4195  | 0.428   | 0.241  |
| rs1996327  | 2 | 112744727 | 0.4736  | 0.4681  | 0.3364  | 0.4882  | 0.4715  | 0.04791 | 0.4602  | 0.4647  | 0.5624 |
| rs13394651 | 2 | 112745114 | 0.4763  | 0.4698  | 0.2672  | 0.4898  | 0.4737  | 0.05852 | 0.464   | 0.466   | 0.8014 |
| rs870761   | 2 | 112745290 | 0.4241  | 0.4249  | 0.8867  | 0.4292  | 0.4222  | 0.3612  | 0.4194  | 0.4273  | 0.2723 |
| rs13385764 | 2 | 112746891 | 0.4759  | 0.4703  | 0.3275  | 0.4895  | 0.474   | 0.06409 | 0.4635  | 0.4666  | 0.6931 |
| rs13401834 | 2 | 112747331 | 0.08755 | 0.08797 | 0.6789  | 0.09213 | 0.09398 | 0.2603  | 0.08336 | 0.08244 | 0.6839 |
| rs11123073 | 2 | 112747653 | 0.4737  | 0.47    | 0.52    | 0.4868  | 0.4736  | 0.1204  | 0.4618  | 0.4665  | 0.5423 |
| rs13414207 | 2 | 112748053 | 0.0739  | 0.0759  | 0.0493  | 0.08908 | 0.09308 | 0.02141 | 0.0599  | 0.05973 | 1      |
| rs11685190 | 2 | 112748704 | 0.4248  | 0.4257  | 0.8647  | 0.4297  | 0.4227  | 0.3623  | 0.4204  | 0.4283  | 0.2741 |
| rs7571009  | 2 | 112749511 | 0.4724  | 0.4698  | 0.6613  | 0.4857  | 0.4734  | 0.1485  | 0.4603  | 0.4664  | 0.4298 |
| rs7571120  | 2 | 112749594 | 0.4736  | 0.472   | 0.7951  | 0.4858  | 0.4756  | 0.2324  | 0.4625  | 0.4685  | 0.4478 |
| rs7592909  | 2 | 112752142 | 0.4735  | 0.4703  | 0.5894  | 0.4858  | 0.4742  | 0.1722  | 0.4622  | 0.4665  | 0.5908 |
| rs6739294  | 2 | 112752880 | 0.4759  | 0.4703  | 0.3402  | 0.4898  | 0.4742  | 0.0641  | 0.4632  | 0.4665  | 0.6928 |
| rs6726639  | 2 | 112753097 | 0.4749  | 0.4699  | 0.3953  | 0.4879  | 0.4737  | 0.09582 | 0.4632  | 0.4663  | 0.693  |
| rs11683421 | 2 | 112753230 | 0.4768  | 0.471   | 0.3151  | 0.4903  | 0.4748  | 0.06974 | 0.4645  | 0.4673  | 0.7198 |
| rs10173553 | 2 | 112753883 | 0.4738  | 0.4699  | 0.5032  | 0.4867  | 0.4736  | 0.1204  | 0.4621  | 0.4663  | 0.5904 |
| rs13003919 | 2 | 112753950 | 0.4243  | 0.4246  | 0.9773  | 0.4294  | 0.4215  | 0.2988  | 0.4197  | 0.4273  | 0.2903 |
| rs4848238  | 2 | 112754720 | 0.4233  | 0.426   | 0.6093  | 0.4287  | 0.4235  | 0.5084  | 0.4184  | 0.4282  | 0.1714 |
| rs3811636  | 2 | 112755209 | 0.4739  | 0.47    | 0.5033  | 0.4867  | 0.4738  | 0.1297  | 0.4623  | 0.4662  | 0.6154 |
| rs10183215 | 2 | 112756645 | 0.08846 | 0.0896  | 0.2796  | 0.09133 | 0.09492 | 0.03999 | 0.08585 | 0.08472 | 0.5539 |
| rs4519530  | 2 | 112759182 | 0.4752  | 0.4699  | 0.367   | 0.4889  | 0.4739  | 0.07553 | 0.4627  | 0.4661  | 0.6665 |
| rs4528767  | 2 | 112759864 | 0.3639  | 0.358   | 0.1769  | 0.3536  | 0.3459  | 0.2065  | 0.3733  | 0.3686  | 0.468  |
| rs13430221 | 2 | 112760875 | 0.09714 | 0.09691 | 1       | 0.09476 | 0.0969  | 0.2033  | 0.09933 | 0.09692 | 0.1659 |
| rs4303721  | 2 | 112761034 | 0.476   | 0.4714  | 0.4259  | 0.4891  | 0.475   | 0.09691 | 0.4641  | 0.4678  | 0.6417 |
| rs4278932  | 2 | 112761310 | 0.3643  | 0.3573  | 0.1116  | 0.3544  | 0.345   | 0.128   | 0.3734  | 0.3681  | 0.4135 |
| rs4848933  | 2 | 112761653 | 0.4757  | 0.4714  | 0.4721  | 0.4888  | 0.475   | 0.1041  | 0.4638  | 0.468   | 0.5919 |
| rs7580261  | 2 | 112762623 | 0.251   | 0.2481  | 0.3543  | 0.2531  | 0.2501  | 0.5286  | 0.249   | 0.2462  | 0.5412 |
| rs13432863 | 2 | 112763269 | 0.08885 | 0.08968 | 0.4179  | 0.09216 | 0.09511 | 0.09334 | 0.08583 | 0.08469 | 0.5539 |
| rs10195619 | 2 | 112765562 | 0.4711  | 0.472   | 0.8773  | 0.4837  | 0.4738  | 0.2505  | 0.4596  | 0.4703  | 0.1742 |
| rs11884641 | 2 | 112767406 | 0.364   | 0.3582  | 0.1881  | 0.3544  | 0.346   | 0.1724  | 0.3728  | 0.3689  | 0.5558 |
| rs7563113  | 2 | 112768177 | 0.3643  | 0.3582  | 0.1665  | 0.3543  | 0.3463  | 0.1894  | 0.3734  | 0.3687  | 0.468  |
| rs10181117 | 2 | 112768439 | 0.0843  | 0.08533 | 0.3173  | 0.08714 | 0.09009 | 0.07512 | 0.08171 | 0.08096 | 0.8342 |

|            |   |           |          |          |          |          |          |          |          |          |         |
|------------|---|-----------|----------|----------|----------|----------|----------|----------|----------|----------|---------|
| rs12469210 | 2 | 112768991 | 0.3642   | 0.3575   | 0.1277   | 0.3546   | 0.3455   | 0.1417   | 0.373    | 0.368    | 0.4394  |
| rs11683409 | 2 | 112770134 | 0.478    | 0.4716   | 0.2693   | 0.4906   | 0.4742   | 0.04988  | 0.4665   | 0.4691   | 0.748   |
| rs10179948 | 2 | 112770821 | 0.09928  | 0.0991   | 1        | 0.1017   | 0.1026   | 0.6063   | 0.09707  | 0.09591  | 0.5995  |
| rs13387346 | 2 | 112773057 | 0.06413  | 0.0648   | 0.3501   | 0.06793  | 0.07018  | 0.07624  | 0.06065  | 0.05986  | 0.7755  |
| rs6710733  | 2 | 112773500 | 0.3648   | 0.3569   | 0.06716  | 0.3549   | 0.3447   | 0.09368  | 0.3739   | 0.3676   | 0.3168  |
| rs6711146  | 2 | 112773834 | 0.4809   | 0.4758   | 0.387    | 0.4951   | 0.4785   | 0.05209  | 0.4679   | 0.4731   | 0.5243  |
| rs10211152 | 2 | 112775509 | 0.06413  | 0.0648   | 0.3501   | 0.06793  | 0.07018  | 0.07624  | 0.06065  | 0.05986  | 0.7755  |
| rs10168067 | 2 | 112777232 | 0.06384  | 0.06426  | 0.5693   | 0.06734  | 0.06906  | 0.1943   | 0.06065  | 0.05986  | 0.7755  |
| rs6712080  | 2 | 112777441 | 0.3635   | 0.3577   | 0.1873   | 0.3531   | 0.3457   | 0.2246   | 0.373    | 0.3682   | 0.4673  |
| rs11683819 | 2 | 112778441 | 0.4794   | 0.4757   | 0.524    | 0.4907   | 0.4786   | 0.1518   | 0.4692   | 0.4729   | 0.6456  |
| rs6737989  | 2 | 112779449 | 0.365    | 0.3578   | 0.1047   | 0.3551   | 0.3454   | 0.1162   | 0.374    | 0.3688   | 0.4142  |
| rs12989808 | 2 | 112779734 | 0.1844   | 0.1988   | 2.16E-08 | 0.1836   | 0.2053   | 2.62E-08 | 0.1852   | 0.1928   | 0.02322 |
| rs13419523 | 2 | 112781917 | 0.1378   | 0.1394   | 0.3848   | 0.1437   | 0.15     | 0.02555  | 0.1325   | 0.1295   | 0.1965  |
| rs6730521  | 2 | 112783957 | 0.3643   | 0.3579   | 0.1453   | 0.3537   | 0.3451   | 0.1701   | 0.3739   | 0.3691   | 0.4668  |
| rs6541998  | 2 | 112785237 | 0.48     | 0.4753   | 0.43     | 0.4932   | 0.4782   | 0.07858  | 0.468    | 0.4726   | 0.5711  |
| rs6723289  | 2 | 112785640 | 0.0639   | 0.06543  | 0.06139  | 0.06699  | 0.0699   | 0.0372   | 0.06105  | 0.06131  | 0.7798  |
| rs10180086 | 2 | 112785891 | 0.06446  | 0.06566  | 0.1372   | 0.06793  | 0.07074  | 0.04031  | 0.06129  | 0.06099  | 1       |
| rs2230516  | 2 | 112786034 | 0.004062 | 0.004054 | 1        | 0.005361 | 0.005347 | 1        | 0.002877 | 0.002873 | 1       |
| rs6710189  | 2 | 112789792 | 0.38     | 0.3805   | 0.8988   | 0.3874   | 0.3946   | 0.3071   | 0.3733   | 0.3669   | 0.316   |
| rs4848971  | 2 | 112790446 | 0.4196   | 0.4164   | 0.5405   | 0.4276   | 0.4139   | 0.06185  | 0.4122   | 0.4186   | 0.3565  |
| rs10211634 | 2 | 112791122 | 0.06008  | 0.06075  | 0.3188   | 0.06428  | 0.06678  | 0.05687  | 0.05623  | 0.05518  | 0.3688  |
| rs10169022 | 2 | 112792656 | 0.4436   | 0.4409   | 0.6204   | 0.4568   | 0.4423   | 0.06817  | 0.4315   | 0.4396   | 0.2844  |
| rs11684476 | 2 | 112793981 | 0.4452   | 0.4423   | 0.6033   | 0.4562   | 0.4431   | 0.09711  | 0.4351   | 0.4416   | 0.3834  |
| rs11897014 | 2 | 112795908 | 0.4455   | 0.4322   | 0.0122   | 0.4514   | 0.4312   | 0.008652 | 0.4401   | 0.4332   | 0.3526  |
| rs9631022  | 2 | 112801179 | 0.06166  | 0.06195  | 0.6934   | 0.06614  | 0.06794  | 0.1218   | 0.05757  | 0.05644  | 0.3703  |
| rs6748256  | 2 | 112803874 | 0.4954   | 0.4993   | 0.5282   | 0.5023   | 0.4997   | 0.7791   | 0.4891   | 0.4986   | 0.2533  |
| rs13001162 | 2 | 112805997 | 0.4206   | 0.4176   | 0.5623   | 0.4303   | 0.4157   | 0.04754  | 0.4118   | 0.4193   | 0.2813  |
| rs6713344  | 2 | 112814045 | 0.3951   | 0.393    | 0.6883   | 0.381    | 0.381    | 1        | 0.4079   | 0.4034   | 0.5327  |
| rs4848978  | 2 | 112816047 | 0.4036   | 0.4033   | 0.9761   | 0.392    | 0.3936   | 0.824    | 0.4141   | 0.4117   | 0.7452  |
| rs4848979  | 2 | 112816236 | 0.4294   | 0.4362   | 0.202    | 0.4391   | 0.4358   | 0.6878   | 0.4207   | 0.4366   | 0.02899 |
| rs4848980  | 2 | 112816348 | 0.4195   | 0.4177   | 0.7496   | 0.4279   | 0.4153   | 0.09113  | 0.4119   | 0.4199   | 0.2634  |
| rs10206255 | 2 | 112834876 | 0.03977  | 0.0401   | 0.5353   | 0.04196  | 0.04342  | 0.07433  | 0.03777  | 0.03706  | 0.638   |
| rs10182333 | 2 | 112841856 | 0.4982   | 0.4959   | 0.7146   | 0.5008   | 0.4951   | 0.5248   | 0.4959   | 0.4966   | 0.9463  |
| rs2067928  | 2 | 112850581 | 0.2058   | 0.2034   | 0.3419   | 0.2065   | 0.2057   | 0.9322   | 0.2053   | 0.2013   | 0.2795  |
| rs9653422  | 2 | 112857642 | 0.5064   | 0.5      | 0.2978   | 0.5138   | 0.5      | 0.1232   | 0.4996   | 0.5      | 0.9733  |
| rs4848272  | 2 | 112858122 | 0.477    | 0.4786   | 0.7789   | 0.4813   | 0.4784   | 0.7685   | 0.473    | 0.4789   | 0.4782  |
| rs7583755  | 2 | 112858485 | 0.1719   | 0.1716   | 0.9437   | 0.1746   | 0.1754   | 0.7648   | 0.1695   | 0.168    | 0.6902  |
| rs954521   | 2 | 112866558 | 0.1354   | 0.1343   | 0.5295   | 0.1447   | 0.1441   | 0.9036   | 0.1269   | 0.1252   | 0.5034  |
| rs7581849  | 2 | 112870730 | 0.4731   | 0.4678   | 0.351    | 0.4725   | 0.4653   | 0.3861   | 0.4737   | 0.47     | 0.6429  |
| rs10172310 | 2 | 112883781 | 0.04126  | 0.04153  | 0.551    | 0.04388  | 0.04526  | 0.09433  | 0.03887  | 0.03811  | 0.6447  |
| rs10166396 | 2 | 112891822 | 0.1185   | 0.12     | 0.3133   | 0.1276   | 0.1327   | 0.03407  | 0.1103   | 0.1082   | 0.3503  |
| rs10202871 | 2 | 112898848 | 0        | 0        | 1        | 0        | 0        | 1        | 0        | 0        | 1       |

|                                                        |   |           |           |           |           |         |         |           |           |           |          |
|--------------------------------------------------------|---|-----------|-----------|-----------|-----------|---------|---------|-----------|-----------|-----------|----------|
| rs7559210                                              | 2 | 112912699 | 0.05846   | 0.06005   | 0.04028   | 0.06618 | 0.06798 | 0.1221    | 0.05143   | 0.05275   | 0.1874   |
| rs2312695                                              | 2 | 112920849 | 0.04644   | 0.04731   | 0.1232    | 0.05017 | 0.05065 | 0.4827    | 0.04304   | 0.04425   | 0.1079   |
| rs12620229                                             | 2 | 112921956 | 0.492     | 0.489     | 0.6384    | 0.5031  | 0.4896  | 0.1241    | 0.4818    | 0.4885    | 0.4112   |
| rs10200201                                             | 2 | 112928815 | 0.4764    | 0.4965    | 0.0009267 | 0.4821  | 0.4954  | 0.1272    | 0.4712    | 0.4974    | 0.001783 |
| rs10191773                                             | 2 | 112930064 | 0.3307    | 0.3303    | 0.9708    | 0.3359  | 0.3306  | 0.3969    | 0.3259    | 0.33      | 0.4466   |
| rs7557904                                              | 2 | 112931936 | 0.2408    | 0.2407    | 1         | 0.2409  | 0.245   | 0.352     | 0.2407    | 0.2368    | 0.3573   |
| rs7600843                                              | 2 | 112939042 | 0.5048    | 0.4998    | 0.4237    | 0.5222  | 0.4999  | 0.01263   | 0.4889    | 0.4997    | 0.2029   |
| rs11885036                                             | 2 | 112952799 | 0.1335    | 0.1339    | 0.7855    | 0.1414  | 0.1445  | 0.2232    | 0.1262    | 0.1242    | 0.4154   |
| rs10183121                                             | 2 | 112953542 | 0.505     | 0.497     | 0.1879    | 0.5012  | 0.4969  | 0.6458    | 0.5084    | 0.4971    | 0.1779   |
| rs17041977                                             | 2 | 112959668 | 0.06768   | 0.0684    | 0.3726    | 0.06792 | 0.06847 | 0.6035    | 0.06747   | 0.06834   | 0.454    |
| rs11685462                                             | 2 | 112971931 | 0.2615    | 0.2579    | 0.2608    | 0.2586  | 0.2539  | 0.302     | 0.2641    | 0.2615    | 0.609    |
| rs1343666                                              | 2 | 112986955 | 0.4034    | 0.4004    | 0.5456    | 0.3987  | 0.3918  | 0.3258    | 0.4077    | 0.4079    | 1        |
| rs34239351                                             | 2 | 112997066 | 0.02124   | 0.02101   | 1         | 0.01622 | 0.01609 | 1         | 0.02584   | 0.02551   | 1        |
| rs11674953                                             | 2 | 113014080 | 0.475     | 0.4729    | 0.7389    | 0.4832  | 0.4738  | 0.2669    | 0.4675    | 0.4721    | 0.5694   |
| rs6542045                                              | 2 | 113015512 | 0.4968    | 0.498     | 0.8631    | 0.4946  | 0.4977  | 0.7199    | 0.4989    | 0.4982    | 0.973    |
| rs4471897                                              | 2 | 113016478 | 0.03844   | 0.03882   | 0.344     | 0.03735 | 0.03725 | 1         | 0.03943   | 0.04026   | 0.1886   |
| rs6705046                                              | 2 | 113017065 | 0.06105   | 0.06221   | 0.1197    | 0.06359 | 0.06502 | 0.1812    | 0.05874   | 0.05964   | 0.3883   |
| rs13001618                                             | 2 | 113036839 | 0         | 0         | 1         | 0       | 0       | 1         | 0         | 0         | 1        |
| rs10165123                                             | 2 | 113041461 | 0.08854   | 0.08888   | 0.6837    | 0.08469 | 0.08614 | 0.3075    | 0.09205   | 0.09137   | 0.854    |
| rs4430968                                              | 2 | 113053061 | 0.4582    | 0.4622    | 0.4908    | 0.4633  | 0.4642  | 0.9093    | 0.4534    | 0.4602    | 0.3946   |
| rs6760417                                              | 2 | 113072762 | 0         | 0         | 1         | 0       | 0       | 1         | 0         | 0         | 1        |
| rs7565648                                              | 2 | 113094694 | 0.0001468 | 0.0001468 | 1         | 0       | 0       | 1         | 0.0002814 | 0.0002813 | 1        |
| rs13407095                                             | 2 | 113112005 | 0.111     | 0.1122    | 0.3855    | 0.1152  | 0.1178  | 0.2295    | 0.1072    | 0.107     | 1        |
| rs13017673                                             | 2 | 113214648 | 0.2034    | 0.2       | 0.1642    | 0.205   | 0.2051  | 0.9321    | 0.202     | 0.1953    | 0.03976  |
| rs7581524                                              | 2 | 113234316 | 0.413     | 0.4072    | 0.2464    | 0.408   | 0.4082  | 1         | 0.4176    | 0.4063    | 0.09961  |
| rs3961919                                              | 2 | 113243321 | 0.4902    | 0.4876    | 0.6728    | 0.4934  | 0.4861  | 0.4066    | 0.4872    | 0.4889    | 0.8372   |
| rs6707618                                              | 2 | 113243799 | 0.2692    | 0.2637    | 0.0816    | 0.2651  | 0.2605  | 0.3471    | 0.2731    | 0.2665    | 0.1494   |
| rs1568120                                              | 2 | 135406890 | 0.4757    | 0.4893    | 0.02153   | 0.4727  | 0.4928  | 0.02094   | 0.4784    | 0.4856    | 0.389    |
| rs10164986                                             | 2 | 135468385 | 0.273     | 0.2773    | 0.2056    | 0.2794  | 0.282   | 0.6188    | 0.2672    | 0.2729    | 0.2198   |
| rs7571217                                              | 2 | 192327964 | 0.06727   | 0.06665   | 0.5844    | 0.06865 | 0.06686 | 0.1844    | 0.06601   | 0.06645   | 0.6115   |
| rs281783                                               | 2 | 200751582 | 0.3053    | 0.311     | 0.1387    | 0.2997  | 0.3037  | 0.4532    | 0.3105    | 0.3176    | 0.1868   |
| rs1831024                                              | 2 | 215858828 | 0.1671    | 0.1702    | 0.1356    | 0.1674  | 0.1735  | 0.0544    | 0.1669    | 0.1673    | 0.842    |
| rs718686                                               | 2 | 218385952 | 0.3347    | 0.3321    | 0.5357    | 0.3368  | 0.3308  | 0.3151    | 0.3328    | 0.3333    | 0.9199   |
| rs10201872                                             | 2 | 231106724 | 0.3153    | 0.3093    | 0.1174    | 0.336   | 0.3242  | 0.04014   | 0.2964    | 0.2951    | 0.8205   |
| rs9271366                                              | 6 | 32586854  | 0.3681    | 0.3668    | 0.7898    | 0.4857  | 0.449   | 3.781E-06 | 0.2617    | 0.2589    | 0.5575   |
| Variants tested in second round of association testing |   |           |           |           |           |         |         |           |           |           |          |
| rs9271366                                              | 6 | 32586854  | 0.3685    | 0.3637    | 0.5125    | 0.4728  | 0.4364  | 0.001335  | 0.2643    | 0.2637    | 1        |
| rs115416402                                            | 2 | 112645419 | 0.09274   | 0.09207   | 0.8434    | 0.08908 | 0.08877 | 1         | 0.09639   | 0.09536   | 1        |
| rs115531771                                            | 2 | 112648710 | 0.0944    | 0.09296   | 0.5533    | 0.09024 | 0.0886  | 0.7676    | 0.09854   | 0.09727   | 0.7941   |
| rs72823471                                             | 2 | 112655396 | 0.06308   | 0.06359   | 0.5629    | 0.05544 | 0.05643 | 0.3578    | 0.07071   | 0.07069   | 1        |
| rs115821982                                            | 2 | 112656392 | 0.08788   | 0.09075   | 0.1006    | 0.07925 | 0.08472 | 0.02285   | 0.09656   | 0.09676   | 0.79     |

|             |   |           |         |         |          |         |         |          |         |         |           |
|-------------|---|-----------|---------|---------|----------|---------|---------|----------|---------|---------|-----------|
| rs72409080  | 2 | 112660712 | 0.08896 | 0.09229 | 0.06928  | 0.08161 | 0.08805 | 0.01143  | 0.09632 | 0.0965  | 0.7908    |
| rs17174870  | 2 | 112665201 | 0.3677  | 0.3581  | 0.1517   | 0.3589  | 0.3505  | 0.3751   | 0.3764  | 0.3656  | 0.2868    |
| rs150406081 | 2 | 112667020 | 0.03732 | 0.03727 | 1        | 0.03336 | 0.03409 | 0.3624   | 0.04128 | 0.04043 | 1         |
| rs4271775   | 2 | 112675149 | 0.09008 | 0.09336 | 0.07189  | 0.08193 | 0.08838 | 0.01169  | 0.09831 | 0.09835 | 1         |
| rs56264210  | 2 | 112684419 | 0.08801 | 0.09085 | 0.1017   | 0.08094 | 0.08622 | 0.02806  | 0.09514 | 0.09549 | 0.785     |
| rs72823495  | 2 | 112688481 | 0.0877  | 0.09057 | 0.1001   | 0.07879 | 0.08432 | 0.02143  | 0.09658 | 0.09675 | 0.7914    |
| rs72823500  | 2 | 112695386 | 0.08976 | 0.09299 | 0.07248  | 0.08088 | 0.08738 | 0.01044  | 0.0986  | 0.09853 | 1         |
| rs10165614  | 2 | 112698460 | 0.08994 | 0.09314 | 0.07352  | 0.08211 | 0.08849 | 0.0123   | 0.09774 | 0.09775 | 1         |
| rs13404771  | 2 | 112702284 | 0.08905 | 0.09177 | 0.1086   | 0.07965 | 0.08628 | 0.00882  | 0.09846 | 0.09723 | 1         |
| rs10171303  | 2 | 112705427 | 0.08899 | 0.09292 | 0.02846  | 0.08104 | 0.08877 | 0.003652 | 0.09693 | 0.09704 | 0.7934    |
| rs9808061   | 2 | 112706759 | 0.08966 | 0.09294 | 0.07106  | 0.08121 | 0.08772 | 0.01069  | 0.09812 | 0.09814 | 1         |
| rs13388623  | 2 | 112708321 | 0.08881 | 0.09214 | 0.06904  | 0.08139 | 0.08782 | 0.01125  | 0.09626 | 0.09644 | 0.7907    |
| rs143306687 | 2 | 112710056 | 0.08929 | 0.092   | 0.1094   | 0.07992 | 0.08533 | 0.02465  | 0.09866 | 0.09862 | 1         |
| rs13393166  | 2 | 112710205 | 0.08973 | 0.09296 | 0.07242  | 0.0815  | 0.08794 | 0.01134  | 0.09793 | 0.09793 | 1         |
| NOVEL SNP   | 2 | 112718074 | 0.08434 | 0.102   | 1.01E-13 | 0.07609 | 0.09772 | 1.68E-10 | 0.09256 | 0.1063  | 3.11E-05  |
| rs28529268  | 2 | 112719021 | 0.0875  | 0.09037 | 0.09959  | 0.08038 | 0.08572 | 0.02623  | 0.09463 | 0.095   | 0.7841    |
| rs139378193 | 2 | 112727229 | 0.02664 | 0.02693 | 0.4291   | 0.02869 | 0.02827 | 1        | 0.0246  | 0.02559 | 0.2208    |
| rs10207237  | 2 | 112734855 | 0.08881 | 0.09216 | 0.06855  | 0.07981 | 0.08644 | 0.008924 | 0.09779 | 0.09783 | 1         |
| rs13397194  | 2 | 112737979 | 0.08792 | 0.09022 | 0.1535   | 0.07929 | 0.08491 | 0.02134  | 0.09643 | 0.09542 | 1         |
| rs114783679 | 2 | 112738584 | 0.02577 | 0.02609 | 0.4069   | 0.02752 | 0.02714 | 1        | 0.02403 | 0.02505 | 0.2115    |
| rs150806833 | 2 | 112747986 | 0.08865 | 0.09203 | 0.06786  | 0.08054 | 0.08711 | 0.00979  | 0.09677 | 0.09693 | 0.7918    |
| rs13414207  | 2 | 112748053 | 0.0896  | 0.09288 | 0.07095  | 0.08126 | 0.08778 | 0.01073  | 0.09792 | 0.09795 | 1         |
| rs114126070 | 2 | 112749293 | 0.02666 | 0.02695 | 0.4293   | 0.02872 | 0.02831 | 1        | 0.0246  | 0.02559 | 0.2208    |
| rs13413103  | 2 | 112750695 | 0.0864  | 0.09003 | 0.03807  | 0.07854 | 0.08538 | 0.007174 | 0.09421 | 0.09464 | 0.7822    |
| rs10864895  | 2 | 112764394 | 0.4638  | 0.4727  | 0.3136   | 0.4825  | 0.4768  | 0.6634   | 0.4452  | 0.4684  | 0.06045   |
| rs138575760 | 2 | 112764470 | 0.08201 | 0.1007  | 5.17E-15 | 0.07718 | 0.09274 | 5.72E-07 | 0.08681 | 0.1085  | 1.92E-09  |
| rs10195619  | 2 | 112765562 | 0.4635  | 0.4736  | 0.2474   | 0.482   | 0.4775  | 0.7454   | 0.4451  | 0.4694  | 0.04782   |
| rs13396030  | 2 | 112772998 | 0.07026 | 0.07089 | 0.6      | 0.06488 | 0.06777 | 0.1061   | 0.07564 | 0.07401 | 0.7222    |
| rs56361454  | 2 | 112774105 | 0.4497  | 0.4489  | 0.935    | 0.4725  | 0.4556  | 0.1722   | 0.427   | 0.4417  | 0.1979    |
| rs7422195   | 2 | 112775064 | 0.4735  | 0.4682  | 0.5527   | 0.4955  | 0.4737  | 0.08544  | 0.4518  | 0.4622  | 0.3963    |
| rs71957777  | 2 | 112776657 | 0.06983 | 0.06987 | 0.7966   | 0.0643  | 0.06723 | 0.1008   | 0.07533 | 0.0725  | 0.2682    |
| rs13416895  | 2 | 112778261 | 0.07056 | 0.07057 | 1        | 0.06389 | 0.06687 | 0.09652  | 0.07723 | 0.07425 | 0.1663    |
| rs112340384 | 2 | 112779548 | 0.0917  | 0.0881  | 0.01999  | 0.0931  | 0.08998 | 0.2525   | 0.0903  | 0.08622 | 0.07011   |
| rs72825667  | 2 | 112779732 | 0.07965 | 0.09837 | 1.33E-15 | 0.07641 | 0.1039  | 4.63E-14 | 0.08289 | 0.09283 | 0.0005121 |
| rs6735717   | 2 | 112780064 | 0.0704  | 0.07103 | 0.6004   | 0.06443 | 0.06861 | 0.03564  | 0.07636 | 0.07344 | 0.272     |
| rs150632843 | 2 | 112781454 | 0.06954 | 0.07023 | 0.5958   | 0.06363 | 0.06661 | 0.09544  | 0.07543 | 0.07382 | 0.7221    |
| rs13419523  | 2 | 112781917 | 0.1515  | 0.1529  | 0.5512   | 0.1435  | 0.1514  | 0.05714  | 0.1593  | 0.1544  | 0.3128    |
| rs72825671  | 2 | 112782371 | 0.09173 | 0.08813 | 0.02008  | 0.09413 | 0.0909  | 0.2531   | 0.08933 | 0.08534 | 0.07025   |
| rs72825672  | 2 | 112783327 | 0.09103 | 0.0875  | 0.01981  | 0.09335 | 0.09021 | 0.2525   | 0.08873 | 0.08479 | 0.1146    |
| rs72825673  | 2 | 112784082 | 0.09267 | 0.08898 | 0.02075  | 0.09413 | 0.0909  | 0.2531   | 0.09121 | 0.08705 | 0.07048   |
| rs67734060  | 2 | 112784544 | 0.06865 | 0.06941 | 0.5911   | 0.06367 | 0.0679  | 0.03298  | 0.07363 | 0.07092 | 0.2617    |
| rs6723394   | 2 | 112785696 | 0.06992 | 0.0712  | 0.2986   | 0.06309 | 0.06736 | 0.03079  | 0.07672 | 0.07501 | 0.7245    |

|            |   |           |         |         |           |         |         |          |         |         |          |
|------------|---|-----------|---------|---------|-----------|---------|---------|----------|---------|---------|----------|
| rs4848958  | 2 | 112785775 | 0.2868  | 0.4871  | 6.22E-114 | 0.3046  | 0.4911  | 2.19E-49 | 0.269   | 0.4824  | 8.92E-67 |
| rs2230517  | 2 | 112786049 | 0.06983 | 0.07049 | 0.5976    | 0.06296 | 0.06599 | 0.09023  | 0.07667 | 0.07496 | 0.7245   |
| rs13402707 | 2 | 112786990 | 0.07012 | 0.07076 | 0.5995    | 0.06488 | 0.06901 | 0.0378   | 0.07533 | 0.0725  | 0.2682   |
| rs6755828  | 2 | 112787215 | 0.1516  | 0.1531  | 0.5508    | 0.1451  | 0.1527  | 0.06061  | 0.1581  | 0.1534  | 0.3107   |
| rs10198880 | 2 | 112787805 | 0.1513  | 0.1523  | 0.7181    | 0.1444  | 0.151   | 0.1186   | 0.1582  | 0.1535  | 0.311    |
| rs13406390 | 2 | 112788095 | 0.1517  | 0.1526  | 0.7195    | 0.1447  | 0.1512  | 0.1196   | 0.1588  | 0.154   | 0.3117   |
| rs13425080 | 2 | 112788380 | 0.152   | 0.1528  | 0.7209    | 0.1457  | 0.152   | 0.1227   | 0.1582  | 0.1535  | 0.3114   |
| rs10165940 | 2 | 112789092 | 0.07093 | 0.07213 | 0.3099    | 0.06689 | 0.06963 | 0.124    | 0.07497 | 0.07463 | 1        |

a. Chr=chromosome. b. Location relative to the Human February 2009 (GRC37/hg19) assembly.

c. Obs = observed. d. Exp = expected. Variants highlighted in grey failed both HWE testing and manual quality control.
