# Supplementary material for: Common and Low Frequency Variants in MERTK Are Independently Associated with Multiple Sclerosis Susceptibility with Discordant Association Dependent upon HLA-DRB1*15:01 Status
Source: PubMed Central journal article supplement (PMC4798184; doi:10.1371/journal.pgen.1005853), 2016-03-18
Supplement: pgen.1005853.s003.pdf [file pgen.1005853.s003.pdf]

Table S2: Apparent size of TA<sub>n</sub>T<sub>n</sub> repeat expansion in tested samples

| Genotype at rs13414207 | Phenotype | PCR product size 1 <sup>a</sup> |
|------------------------|-----------|---------------------------------|
| GG                     | Control   | 853                             |
| GG                     | Control   | 905                             |
| GG                     | Control   | 841                             |
| GG                     | Control   | 837                             |
| GG                     | Control   | 749                             |
| GG                     | Control   | 570                             |
| GG                     | Control   | 695                             |
| GG                     | Control   | 832                             |
| GG                     | Control   | 828                             |
| GG                     | Control   | 831                             |
| GG                     | Control   | 828                             |
| GG                     | Control   | 832                             |
| GG                     | Control   | 772                             |
| GG                     | Control   | 828                             |
| GG                     | Control   | 830                             |
| GG                     | Control   | 840                             |
| GG                     | Control   | 833                             |
| GG                     | Control   | 840                             |
| GG                     | Control   | 836                             |
| GG                     | Control   | 834                             |
| GG                     | Control   | 783                             |
| GG                     | Control   | 831                             |
| GG                     | Control   | 754                             |
| GG                     | Control   | 776                             |
| GG                     | Control   | 862                             |
| GG                     | Control   | 837                             |
| GG                     | Control   | 829                             |
| GG                     | Control   | 830                             |
| GG                     | Control   | 826                             |
| GG                     | Control   | 939                             |
| GG                     | Control   | 831                             |
| GG                     | Control   | 826                             |
| GG                     | Control   | 835                             |
| GG                     | Control   | 831                             |
| GG                     | Control   | 825                             |
| GG                     | Control   | 826                             |

|    |         |     |
|----|---------|-----|
| GG | Control | 935 |
| GG | Control | 838 |
| GG | Control | 836 |
| GG | Control | 830 |
| GG | Control | 830 |
| GG | Control | 838 |
| GG | Control | 827 |
| GG | Control | 829 |
| GG | Control | 828 |
| GG | Control | 829 |
| GG | Control | 830 |
| GG | Control | 820 |
| GG | Control | 819 |
| GG | Control | 836 |
| GG | Control | 835 |
| GG | Control | 835 |
| GG | Control | 833 |
| GG | Control | 878 |
| GG | Control | 763 |
| GG | Control | 763 |
| GG | Control | 828 |
| GG | Control | 825 |
| GG | Control | 844 |
| GG | Control | 837 |
| GG | Control | 835 |
| GG | Control | 835 |
| GG | Control | 842 |
| GG | Control | 838 |
| GG | Control | 835 |
| GG | Control | 833 |
| GG | Control | 830 |
| GG | Control | 887 |
| GG | Control | 841 |
| GG | Control | 748 |
| GG | Control | 840 |
| GG | Control | 839 |
| GG | Control | 831 |
| GG | Control | 887 |
| GG | Control | 841 |
| GG | Control | 748 |
| GG | Control | 840 |
| GG | Control | 839 |

|    |         |     |
|----|---------|-----|
| GG | Control | 831 |
| GG | Control | 887 |
| GG | Control | 841 |
| GG | Control | 748 |
| GG | Control | 840 |
| GG | Control | 839 |
| GG | Control | 831 |
| GG | Control | 719 |
| GG | Control | 826 |
| GG | Control | 758 |
| GG | Control | 825 |
| GG | Control | 830 |
| GG | Control | 830 |
| GG | Control | 830 |
| GG | Control | 812 |
| GG | Control | 797 |
| GG | Control | 843 |
| GG | Control | 838 |
| GG | Control | 834 |
| GG | Control | 834 |
| GG | Control | 834 |
| GG | Control | 834 |
| GG | Control | 831 |
| GG | Control | 830 |
| GG | Control | 838 |
| GG | Control | 835 |
| GG | Control | 828 |
| GG | Control | 824 |
| GG | Control | 846 |
| GG | Control | 845 |
| GG | Control | 845 |
| GG | Control | 842 |
| GG | Control | 842 |
| GG | Control | 846 |
| AG | Control | 828 |
| AG | Control | 716 |
| AG | Control | 828 |
| AG | Control | 818 |
| AG | Control | 824 |
| AG | Control | 945 |
| AG | Control | 987 |
| AA | Control | 940 |

|    |         |       |
|----|---------|-------|
| AA | Control | 986   |
| AA | Control | 975   |
| AA | Control | 978   |
| AA | Control | 956   |
| GG | Case    | 833   |
| GG | Case    | 834   |
| GG | Case    | 835   |
| GG | Case    | 830   |
| GG | Case    | 831   |
| GG | Case    | 875   |
| GG | Case    | 826   |
| GG | Case    | 845   |
| GG | Case    | 843   |
| GG | Case    | 840   |
| GG | Case    | 842   |
| GG | Case    | 839   |
| GG | Case    | 842   |
| GG | Case    | 840   |
| GG | Case    | 836   |
| GG | Case    | 836   |
| GG | Case    | 833   |
| GG | Case    | 827   |
| GG | Case    | 828   |
| AG | Case    | 840   |
| AA | Case    | 940   |
| AA | Case    | 998   |
| AA | Case    | 967   |
| AA | Case    | 1,004 |
| AA | Case    | 976   |
| AA | Case    | 981   |
| AA | Case    | 1,007 |
| AA | Case    | 977   |
| AA | Case    | 1,006 |
| AA | Case    | 973   |
| AA | Case    | 956   |
| AA | Case    | 962   |
| AA | Case    | 985   |
| AA | Case    | 963   |

a. In general only a single PCR product was detected for any individual
