# Supplementary material for: Common and Low Frequency Variants in MERTK Are Independently Associated with Multiple Sclerosis Susceptibility with Discordant Association Dependent upon HLA-DRB1*15:01 Status
Source: PubMed Central journal article supplement (PMC4798184; doi:10.1371/journal.pgen.1005853), 2016-03-18
Supplement: pgen.1005853.s004.pdf [file pgen.1005853.s004.pdf]

Table S3: Analysis of linkage between rs13414207 and the intron 4 AluYf4 insertion in two populations

| Population              | Genotype at rs13414207               |                                                                  |                                                       |
|-------------------------|--------------------------------------|------------------------------------------------------------------|-------------------------------------------------------|
|                         | GG                                   | AG                                                               | AA                                                    |
| Caucasian<br>Australian | No insertions<br>detected<br>(n=170) | All samples<br>heterozygous<br>for AluY4f<br>insertion<br>(n=14) | Sample<br>homozygous for<br>AluYf4 insertion<br>(n=1) |
| German                  | No insertions<br>detected<br>(n=161) | All samples<br>heterozygous<br>for AluY4f<br>insertion<br>(n=28) | N/A<br>(no AA samples<br>tested)                      |
